# Supplementary material for: An economic and scalable approach to synthesize high power LiFePO4/C nanocomposites from nano-FePO4 precipitated from an impinging jet reactor
Source: Royal Society of Chemistry journal article supplement (doi:10.1039/c3ta11586k), 2013-01-01
Supplement: c3ta11586k.pdf [file c3ta11586k.pdf]

## Supporting Information

**An Economic and Scalable Approach to Synthesize High Power LiFePO<sub>4</sub>/C**

**Nanocomposites from Nano-FePO<sub>4</sub> Precipitated from an Impinging Jet Reactor**

Peng Yan, Lei Lu, Xiao-min Liu<sup>\*</sup>, Yin Cao, Zhi-peng Zhang, Hui Yang<sup>\*</sup> and Xiao-dong Shen

College of Materials Science and Engineering, Nanjing University of Technology, Nanjing, Jiangsu, 210009,

China

---

<sup>\*</sup> Corresponding authors. *E-mail address*: [liuxm@njut.edu.cn](mailto:liuxm@njut.edu.cn) (Xiao-Min Liu); [yanghui@njut.edu.cn](mailto:yanghui@njut.edu.cn) (Hui Yang)

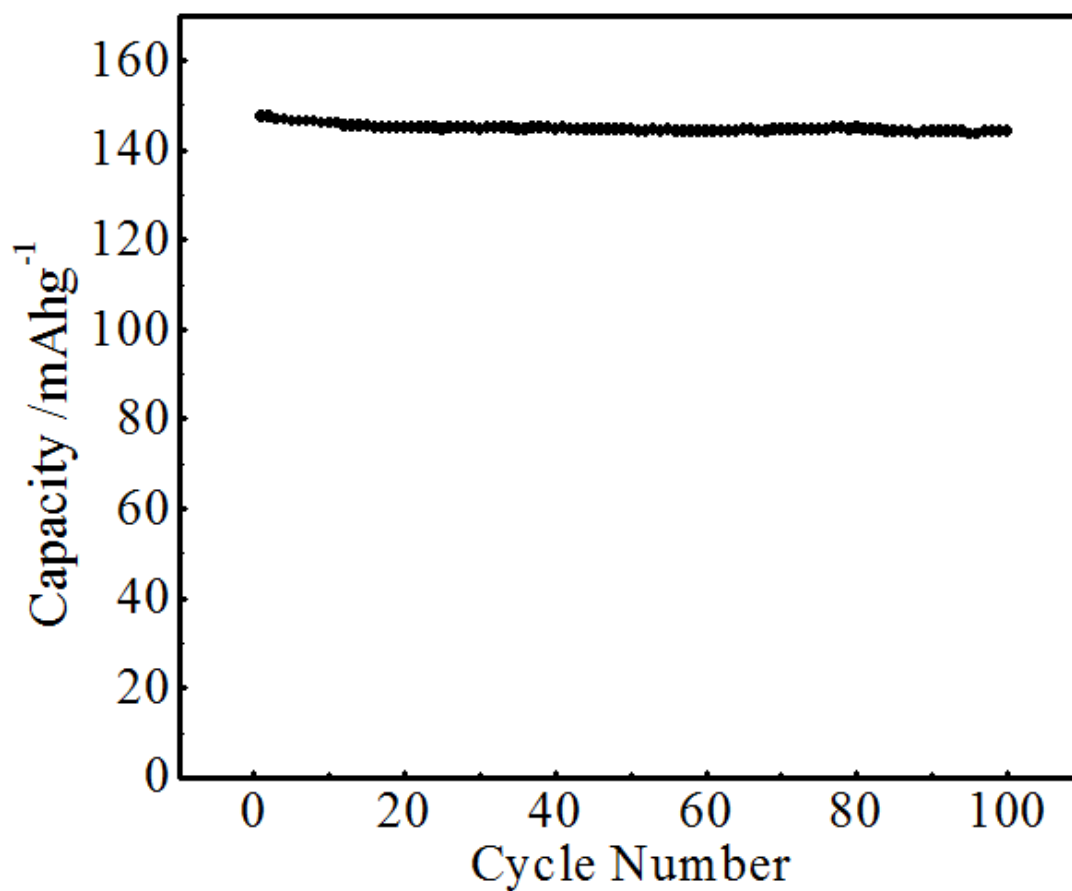

**Fig. s1** The cycling profile of LFP/C composites resulting from the precursors containing 17% glucose tested at a current density of 10C.

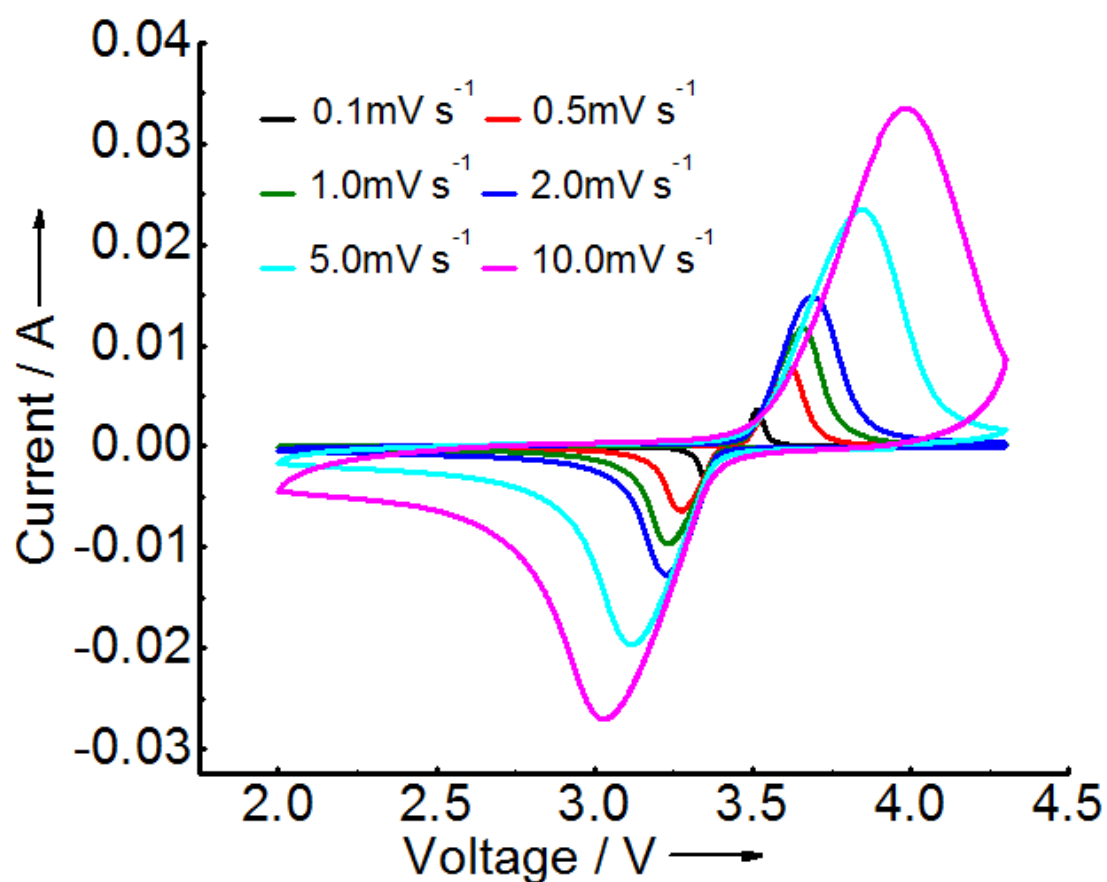

**Figure s2.** Cyclic voltammetry tests at different scan rates in the potential window  
2.0-4.3 V (vs. Li<sup>+</sup>/Li)

The cyclic voltammetry curve scanned at 0.1 mVs<sup>-1</sup> reveals redox peaks centering at 3.52 V and 3.35 V vs. Li<sup>+</sup>/Li, corresponding to Li<sup>+</sup> extraction and insertion processes, respectively. With the increase of the scan rate, the anodic peak shifts to high potential while the cathodic peak shifts to low potential, accompanied by the increase of the peak currents (*i<sub>p</sub>*). The cathodic peak currents slightly lower than the anodic peak currents suggests the slightly kinetics difference between Li<sup>+</sup> insertion and extraction.

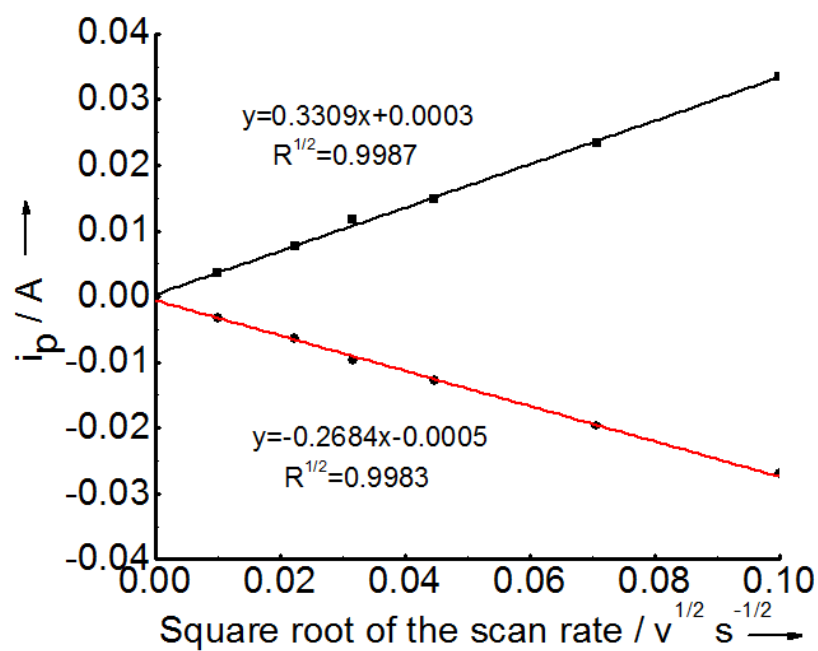

**Figure s3.** The half-order dependence of  $i_p$  on  $v$

The half-order dependence of  $i_p$  on  $v$  suggests the reversible lithiation and delithiation processes are under semi-infinite diffusion control for the entire range of scan rates.<sup>[s5-s7]</sup> The diffusion coefficients calculated from the slope of  $i_p$  vs  $v^{1/2}$  are  $3.0 \times 10^{-12} \text{ cm}^2 \text{ s}^{-1}$  and  $1.96 \times 10^{-12} \text{ cm}^2 \text{ s}^{-1}$  for delithiation and lithiation processes, respectively.
